# Supplementary material for: Antibiotics induce polarization of pleural macrophages to M2-like phenotype in patients with tuberculous pleuritis
Source: PubMed Central journal article supplement (PMC5670217; doi:10.1038/s41598-017-14808-9), 2017-11-03
Supplement: 41598_2017_14808_MOESM1_ESM.pdf [file 41598_2017_14808_MOESM1_ESM.pdf]

## Supplemental information

### Antibiotics induce polarization of pleural macrophages to M2-like phenotype in patients with tuberculous pleuritis

Sisi Wang<sup>1,#</sup>, Jian Zhang<sup>1,2,#</sup>, Liyan Sui<sup>1</sup>, Hao Xu<sup>1</sup>, Qianling Piao<sup>1</sup>, Ying Liu<sup>1,3</sup>, Xinglong Qu<sup>1,3</sup>, Ying Sun<sup>3</sup>, Lei Song<sup>3</sup>, Dan Li<sup>3</sup>, Liping Peng<sup>3</sup>, Shucheng Hua<sup>1,3\*</sup>, Guangan Hu<sup>4,\*</sup>, Jianzhu Chen<sup>1,4,\*</sup>

1. Department of Translational Medicine, The First Hospital, Jilin University, Changchun, 130061, China.

2. The Infectious Disease Hospital of Changchun, Changchun, Jilin, Changchun, 130123.

3. Department of Respiratory Medicine, The First Hospital, Jilin University, Changchun, 130021, China.

4. Koch Institute for Integrative Cancer Research and Department of Biology, Massachusetts Institute of Technology, 77 Massachusetts Avenue, Cambridge, MA, USA 02139.

# These authors contribute equally.

\* corresponding authors: Guangan Hu (gahu@mit.edu), or Jianzhu Chen (jchen@mit.edu), or Shucheng Hua (shuchenghua@eyou.com)

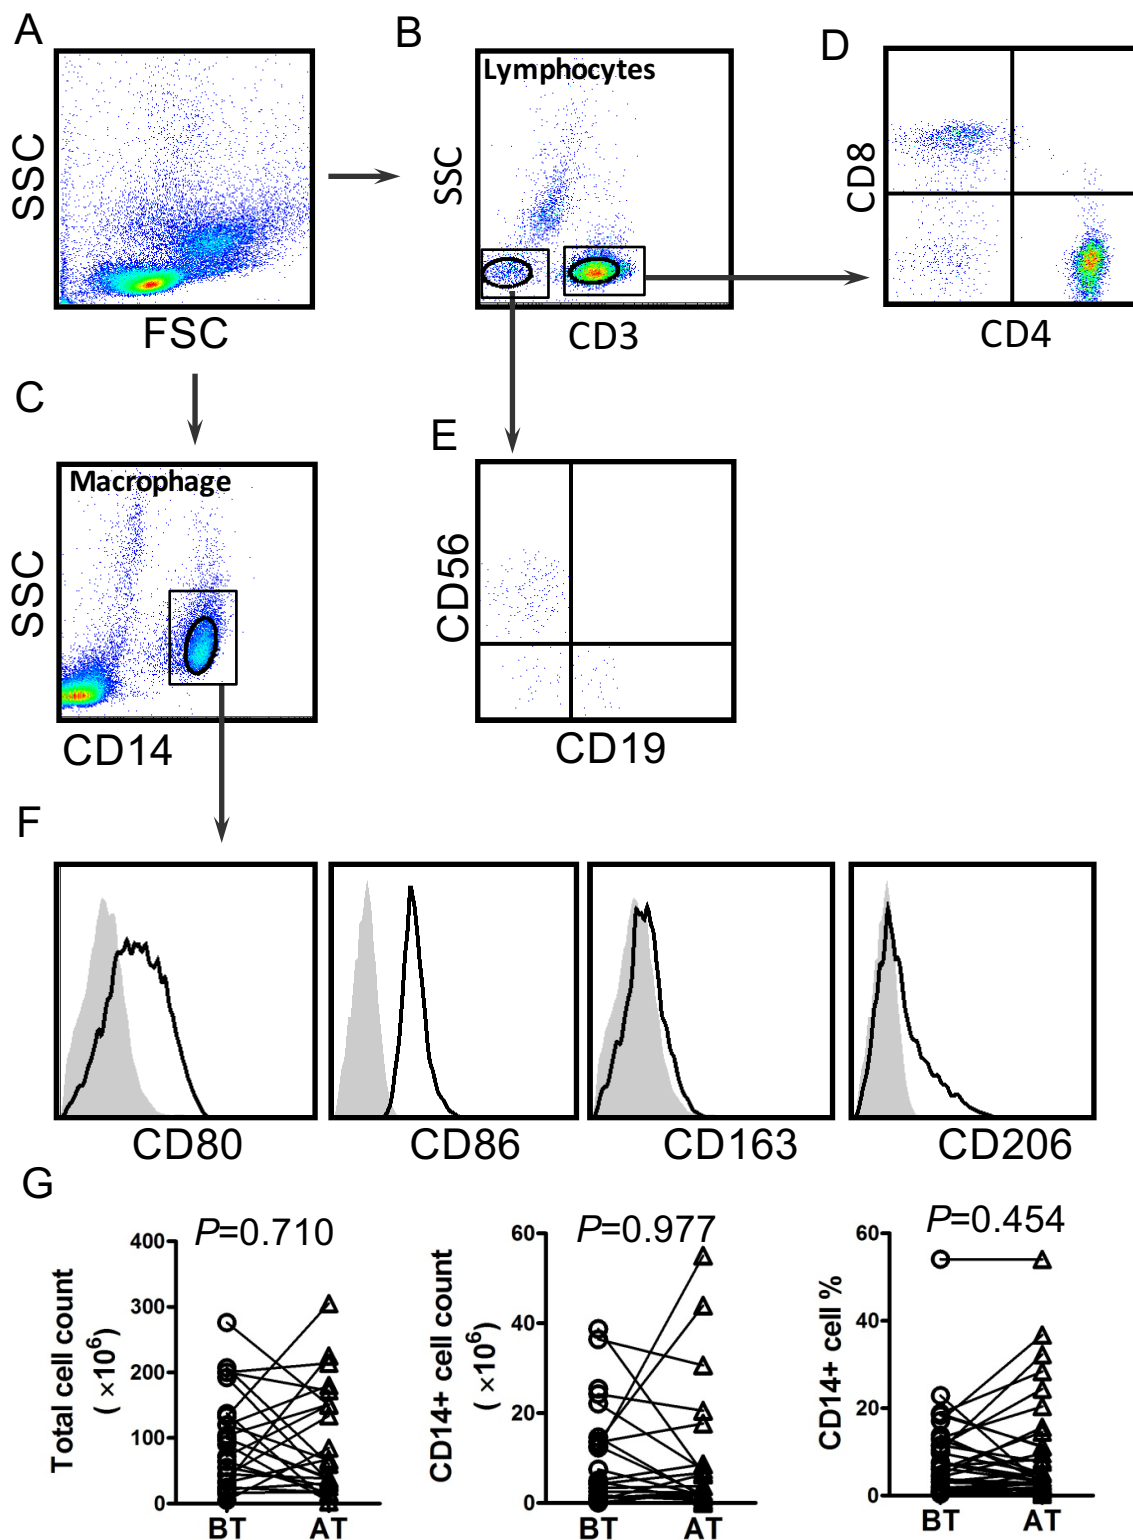

Figure S1. Flow cytometry analysis of various immune cells in tuberculous pleural fluids. Cells were stained for various markers and analyzed by flow cytometry. Representative staining profiles showing (A) forward scatter (FSC) vs. side scatter (SSC), (B) CD3 vs. SSC, and (C) CD14 vs. SSC gating on live cells; (D) CD4 vs. CD8 on CD3<sup>+</sup> live cells; (E) CD19 vs. CD56 gating on CD3<sup>-</sup> live cells. (F) Histogram showing CD80, CD86, CD163, and CD206 gating on CD14<sup>+</sup> cells of staining with isotype (shaded trace) and each antibody (black trace). (G) total number of pleural cells, total number and proportion of pleural macrophages before and after antibiotic treatment in TPE. *P* values by paired *t*-test between before treatment (BT) and after treatment (AT) are indicated.

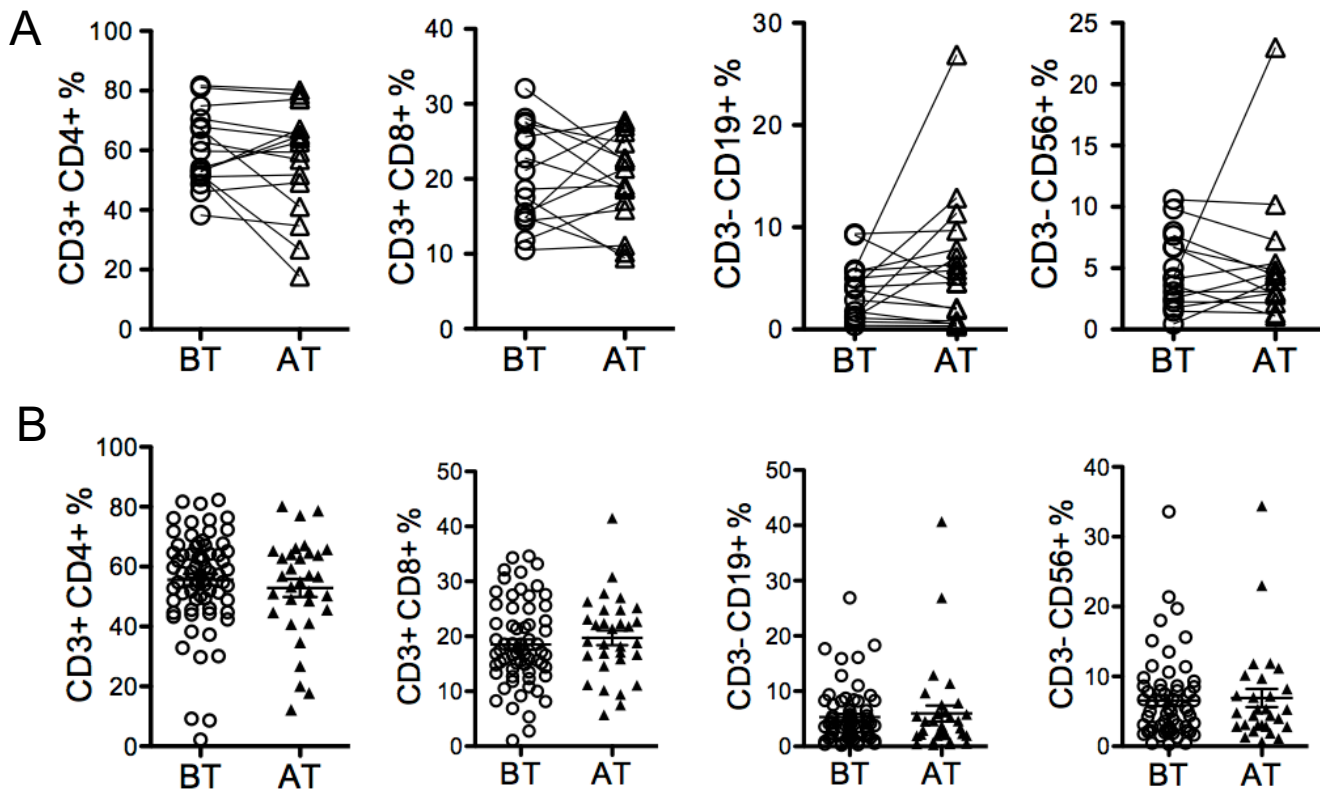

Figure S2. Comparison of percentages of CD4<sup>+</sup> and CD8<sup>+</sup> T cells, CD19<sup>+</sup> B cells and CD56<sup>+</sup> NK cells before (BT) and after (AT) antibiotics treatment. (A) Paired samples (n=29). (B) Unpaired samples (n=128).

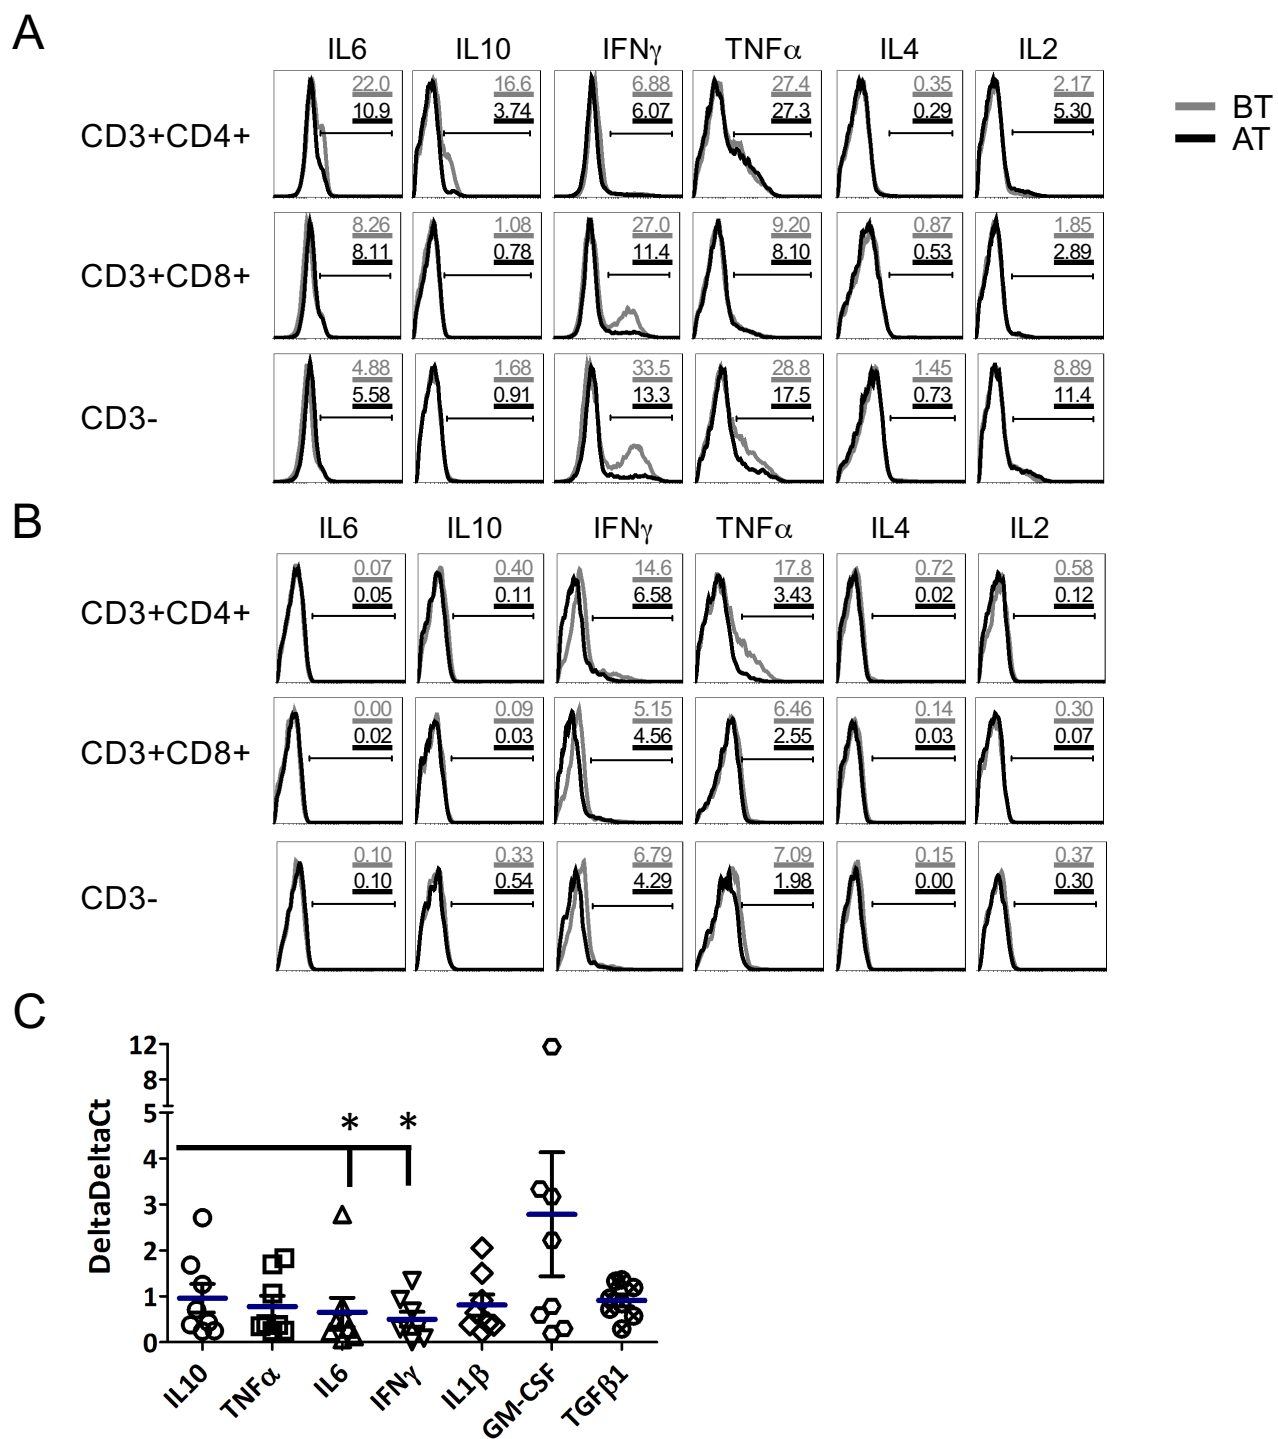

Figure S3. A-B, Intracellular staining of cytokines in pleural leukocytes before and after antibiotics treatment. Leukocytes were isolated from pleural fluids and stimulated *in vitro* for 18 hours (A) and 4 hours (B) with PMA and ionomycin in the presence of GolgiStop. Representative histograms show intracellular cytokine staining gating on CD3<sup>+</sup>CD4<sup>+</sup>, CD3<sup>+</sup>CD8<sup>+</sup>, and CD3<sup>-</sup> cells (n=6). AT, black trace and BT, grey trace. C, Comparison of the transcript levels of indicated cytokine genes in pleural macrophages isolated from patients before and after antibiotics treatment. Transcript level of each gene was normalized to GAPDH (ct). The ratio of ct before and after treatment is shown (n=8). Error bar, SEM; \*,  $P < 0.05$ .

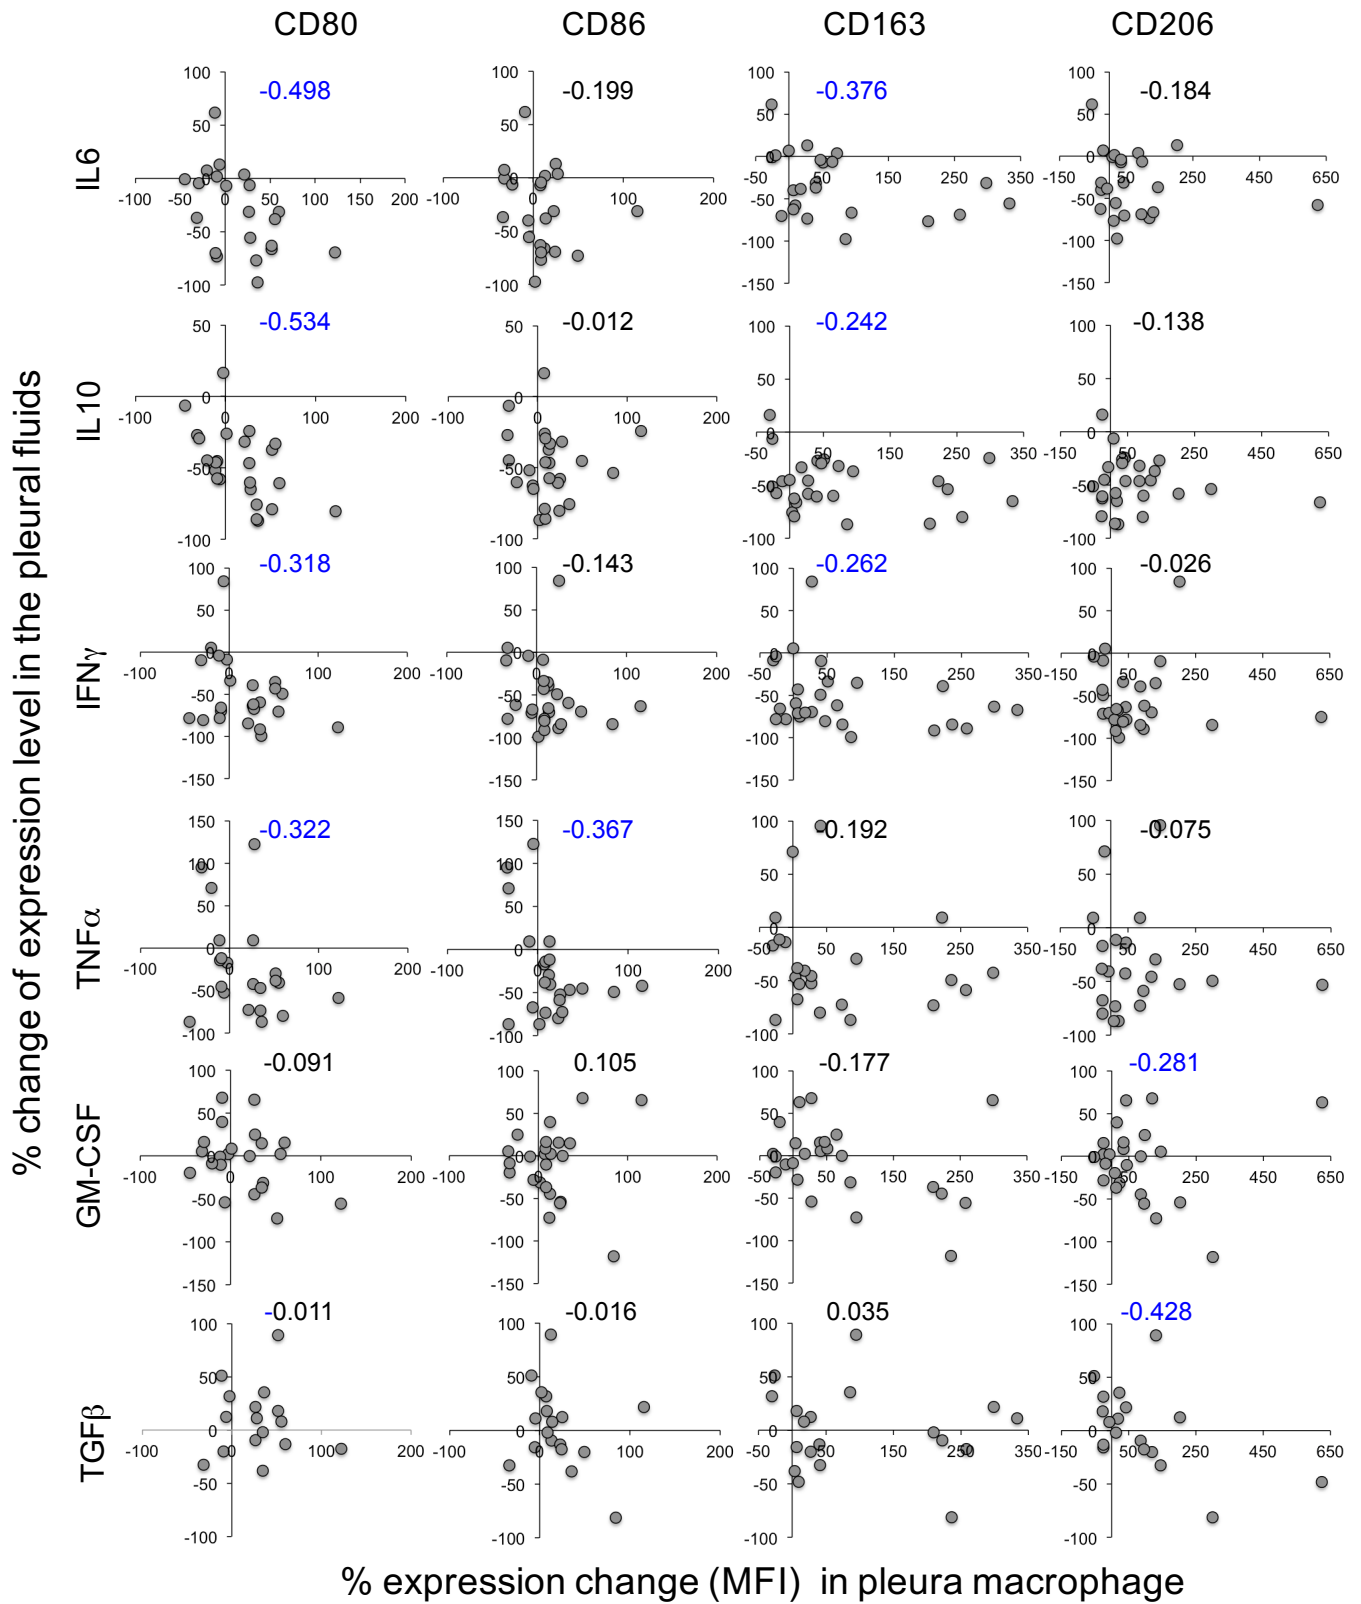

Figure S4. Correlation analysis of changes in cytokine levels in pleural fluids and changes in surface marker expression on pleural macrophages in 29 paired samples before and after antibiotics treatment. The numbers show correlation efficiency.

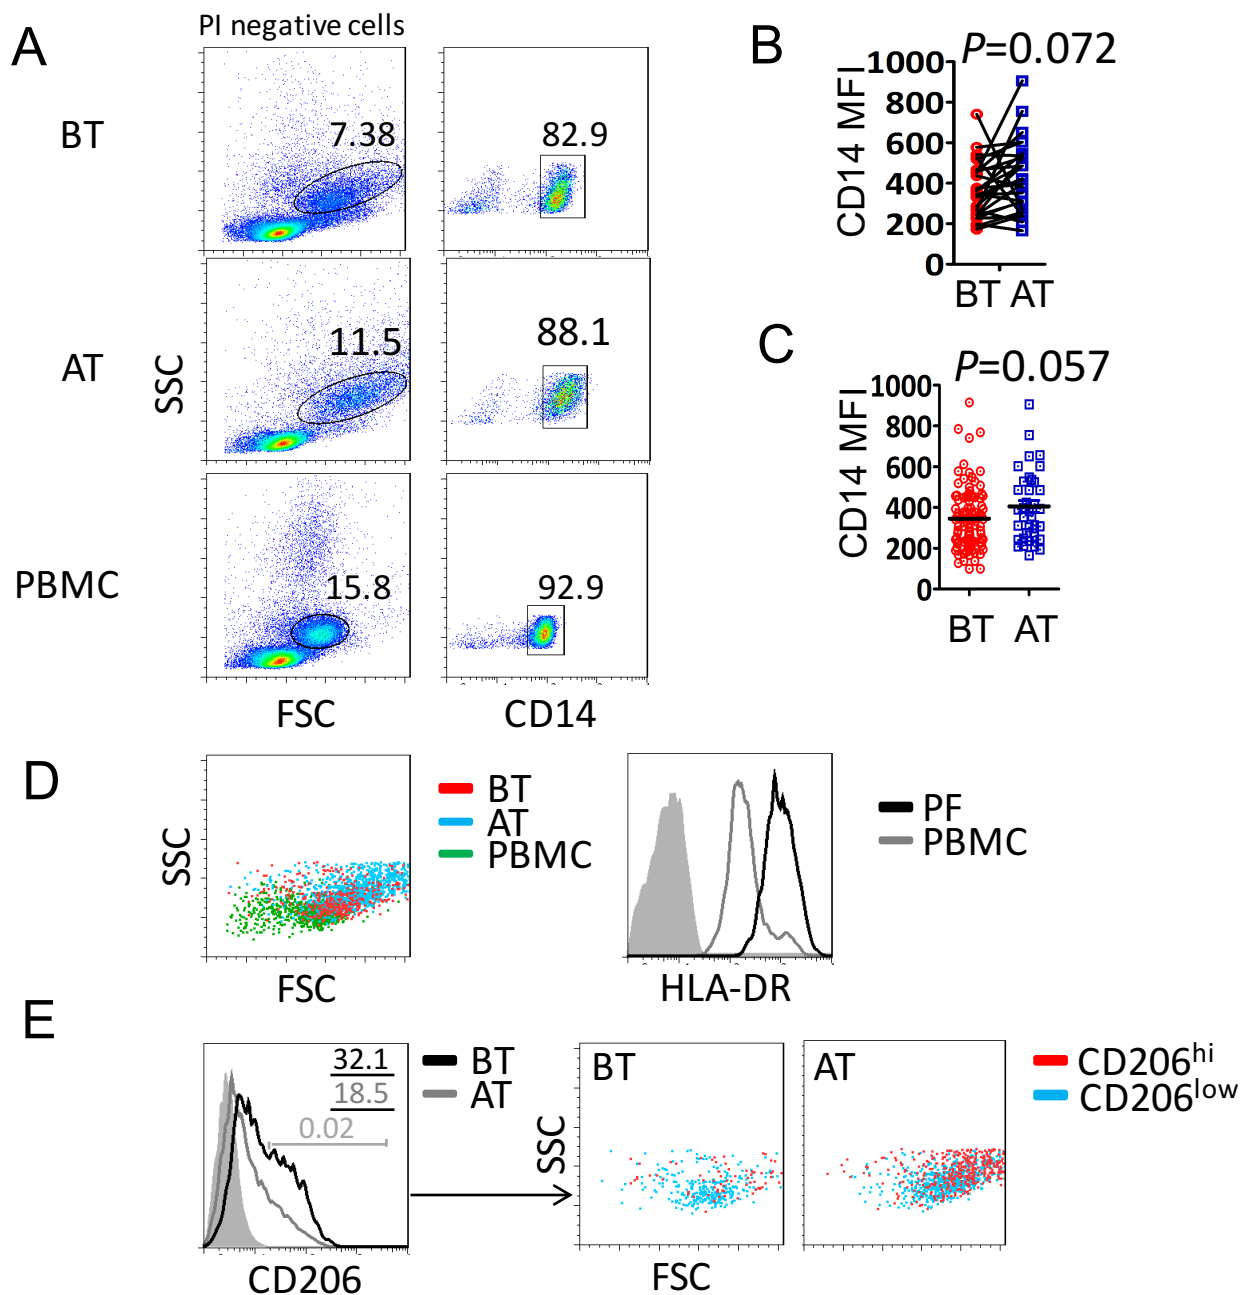

Figure S5. A, The expression of CD14 of monocytes of peripheral blood and pleural macrophages before (BT) and after antibiotics treatment (AT). B-C, Aggregated data from paired samples (B,  $n=29$ ) and unpaired samples (C,  $n=128$ ) showing mean fluorescence intensity (MFI) of CD14.  $P$  values by paired  $t$ -test are shown between BT and AT. D, The FSC/SSC plotting of monocytes of peripheral blood and pleural macrophages ( $CD14^+$  cells) before and after antibiotics treatment. E, The FSC/SSC plotting of  $CD206^{hi}$  and  $CD206^{low}$  pleural macrophages before and after antibiotics treatment. .

**Table S1. The list of 230 treatment-specific signature genes.**

| Gene       | logFC | logCPMLR | PValue | PF118     | PF119  | PF128   | PF131  | PF149  | PF151  | PF154   | PF155  |        |
|------------|-------|----------|--------|-----------|--------|---------|--------|--------|--------|---------|--------|--------|
| A2M        | 2.41  | 8.34     | 8.91   | 0.0028373 | 87.22  | 747.30  | 36.16  | 237.77 | 216.58 | 1037.06 | 59.32  | 175.71 |
| ABCC3      | 1.02  | 3.56     | 5.38   | 0.0203772 | 5.56   | 10.19   | 12.55  | 20.50  | 4.09   | 15.25   | 10.14  | 15.73  |
| ACP5       | 1.20  | 5.48     | 5.97   | 0.0145587 | 23.39  | 42.70   | 67.44  | 79.75  | 16.07  | 43.45   | 14.44  | 68.60  |
| ADAM8      | 1.63  | 6.52     | 8.38   | 0.0037943 | 13.25  | 88.93   | 52.95  | 101.73 | 39.26  | 146.75  | 98.59  | 192.97 |
| ADAMDEC1   | 1.75  | 6.41     | 4.29   | 0.0383258 | 21.62  | 269.05  | 6.48   | 24.70  | 49.84  | 182.86  | 78.16  | 50.40  |
| ADSSL1     | 1.64  | 2.34     | 4.79   | 0.0286773 | 1.59   | 14.55   | 1.74   | 4.18   | 2.74   | 12.65   | 1.89   | 1.69   |
| AFMID      | 1.22  | 2.49     | 5.22   | 0.0223881 | 4.57   | 12.01   | 2.84   | 3.14   | 3.43   | 10.51   | 2.07   | 6.56   |
| AMY2B      | 1.03  | 2.31     | 4.95   | 0.0261092 | 2.85   | 8.98    | 2.04   | 3.39   | 4.45   | 7.42    | 3.53   | 7.12   |
| ANPEP      | 1.18  | 8.50     | 3.95   | 0.0468163 | 328.74 | 412.28  | 426.76 | 554.21 | 29.08  | 234.42  | 280.25 | 635.17 |
| APOC1      | 1.93  | 6.78     | 5.90   | 0.0151784 | 58.97  | 320.32  | 16.41  | 61.11  | 54.62  | 311.54  | 19.51  | 34.44  |
| APOE       | 2.81  | 9.31     | 7.22   | 0.0072183 | 191.34 | 2190.47 | 32.80  | 291.99 | 173.75 | 1936.91 | 87.47  | 157.69 |
| ARL4C      | 2.21  | 6.68     | 6.71   | 0.0095784 | 60.11  | 291.60  | 3.19   | 20.50  | 21.83  | 146.10  | 88.96  | 189.40 |
| ARRDC2     | 1.06  | 5.72     | 7.71   | 0.0054891 | 30.86  | 83.32   | 43.23  | 55.83  | 22.75  | 58.88   | 41.12  | 85.17  |
| ARRDC3     | 1.38  | 7.54     | 5.80   | 0.0160139 | 102.16 | 351.80  | 42.58  | 108.04 | 101.61 | 464.44  | 150.63 | 167.19 |
| ATG16L2    | 1.13  | 4.69     | 7.13   | 0.0075773 | 14.44  | 56.11   | 20.93  | 28.96  | 12.98  | 24.46   | 15.13  | 34.42  |
| ATP13A3    | 1.22  | 7.03     | 5.24   | 0.022032  | 26.58  | 163.04  | 55.31  | 148.61 | 139.14 | 292.73  | 121.77 | 101.09 |
| AVPI1      | 1.23  | 3.47     | 7.11   | 0.0076759 | 3.57   | 8.94    | 7.95   | 17.71  | 7.93   | 20.98   | 6.94   | 14.09  |
| BAIAP2     | 1.26  | 3.40     | 8.38   | 0.0038007 | 5.63   | 11.06   | 7.21   | 17.63  | 6.49   | 18.13   | 5.23   | 12.67  |
| BAIAP2-AS1 | 1.59  | 2.33     | 8.58   | 0.0034012 | 2.46   | 6.52    | 2.87   | 4.61   | 2.74   | 8.80    | 1.70   | 10.30  |
| BBS1       | 1.25  | 1.71     | 5.28   | 0.0215613 | 1.47   | 7.50    | 0.93   | 2.32   | 3.00   | 5.06    | 2.40   | 3.70   |
| BHLHE41    | 1.02  | 6.57     | 4.78   | 0.0287524 | 38.48  | 167.81  | 72.76  | 199.07 | 54.24  | 97.59   | 75.69  | 56.98  |
| C17orf96   | 1.80  | 2.21     | 8.87   | 0.0028953 | 3.17   | 9.96    | 1.06   | 5.36   | 1.64   | 9.37    | 2.59   | 4.17   |
| C5AR1      | 1.14  | 8.51     | 6.15   | 0.0131364 | 179.65 | 724.94  | 144.39 | 303.96 | 275.27 | 604.73  | 301.89 | 380.40 |
| CCL18      | 2.25  | 3.71     | 9.68   | 0.0018677 | 2.19   | 28.87   | 3.50   | 24.78  | 4.65   | 22.59   | 9.56   | 9.04   |
| CD300LB    | 1.25  | 5.32     | 7.64   | 0.0057016 | 18.61  | 28.34   | 21.24  | 73.75  | 18.52  | 51.61   | 33.84  | 73.93  |
| CD9        | 1.52  | 5.48     | 3.94   | 0.0470149 | 9.70   | 9.02    | 53.38  | 146.27 | 8.93   | 43.80   | 14.45  | 71.57  |
| COLEC12    | 1.85  | 3.63     | 4.60   | 0.0320567 | 1.88   | 12.54   | 2.05   | 7.85   | 5.93   | 51.98   | 10.91  | 5.73   |
| COLQ       | 1.34  | 2.94     | 5.26   | 0.0218624 | 4.96   | 17.96   | 1.99   | 4.53   | 8.47   | 14.90   | 2.29   | 6.55   |
| CREM       | 1.52  | 5.39     | 5.71   | 0.0169077 | 11.98  | 89.50   | 10.77  | 18.75  | 23.20  | 104.99  | 35.59  | 40.78  |
| CSNK1E     | 1.10  | 3.07     | 6.42   | 0.0113059 | 4.90   | 8.03    | 3.07   | 9.91   | 6.85   | 12.84   | 6.79   | 14.70  |
| CST7       | 1.14  | 1.55     | 5.16   | 0.0231473 | 1.34   | 2.39    | 1.08   | 3.48   | 2.37   | 3.59    | 2.40   | 6.45   |
| CXCL16     | 1.20  | 8.29     | 7.53   | 0.0060581 | 156.17 | 388.03  | 290.46 | 519.02 | 123.06 | 496.48  | 208.43 | 323.02 |
| CXXC5      | 1.45  | 3.94     | 9.33   | 0.0022519 | 8.65   | 15.95   | 9.44   | 24.73  | 5.00   | 27.38   | 9.93   | 21.12  |
| CYBRD1     | 1.44  | 3.58     | 6.35   | 0.0117417 | 8.68   | 18.19   | 3.35   | 6.77   | 5.14   | 31.72   | 6.86   | 14.67  |
| CYP27A1    | 1.65  | 5.88     | 6.57   | 0.0103561 | 16.74  | 91.69   | 7.92   | 41.56  | 37.61  | 142.69  | 75.72  | 56.64  |
| DEXI       | 1.20  | 4.01     | 6.19   | 0.012816  | 7.09   | 26.11   | 24.19  | 17.41  | 6.95   | 20.64   | 6.41   | 20.50  |
| DNMBP      | 1.85  | 4.51     | 7.38   | 0.0065791 | 5.12   | 20.35   | 7.93   | 17.06  | 10.54  | 85.92   | 10.12  | 25.12  |
| DPEP2      | 1.46  | 3.60     | 7.15   | 0.0075031 | 6.07   | 32.05   | 7.43   | 12.95  | 4.61   | 19.19   | 6.00   | 9.03   |
| DUSP4      | 1.19  | 5.11     | 4.16   | 0.0414694 | 32.11  | 88.51   | 3.90   | 19.42  | 19.89  | 31.74   | 35.62  | 45.36  |
| EDNRB      | 1.07  | 3.93     | 4.14   | 0.0418695 | 5.57   | 17.96   | 7.30   | 6.48   | 12.42  | 35.34   | 11.21  | 25.63  |
| ENO2       | 1.85  | 3.48     | 6.72   | 0.0095559 | 1.56   | 10.42   | 5.38   | 22.22  | 3.59   | 27.28   | 11.65  | 6.90   |
| EPAS1      | 1.58  | 3.98     | 5.53   | 0.0186529 | 4.89   | 21.75   | 5.57   | 11.38  | 7.52   | 56.80   | 8.30   | 9.70   |
| FBXL20     | 1.03  | 2.85     | 4.59   | 0.0320746 | 4.30   | 14.81   | 5.42   | 4.18   | 4.98   | 11.13   | 3.48   | 9.62   |
| FOXO1      | 1.61  | 3.47     | 9.45   | 0.0021133 | 3.51   | 18.15   | 3.62   | 15.67  | 6.62   | 19.69   | 9.49   | 11.99  |
| GABARAPL1  | 1.13  | 7.35     | 7.40   | 0.0065228 | 104.27 | 279.09  | 80.36  | 138.55 | 82.87  | 204.04  | 137.04 | 275.71 |
| GGTA1P     | 1.55  | 5.59     | 5.30   | 0.0212838 | 55.32  | 140.00  | 4.34   | 19.85  | 32.97  | 78.03   | 14.83  | 40.67  |
| GK5        | 1.04  | 3.46     | 4.72   | 0.0298879 | 4.72   | 6.82    | 9.16   | 11.21  | 7.08   | 24.36   | 6.14   | 18.03  |
| GLUD1P3    | 1.10  | 1.86     | 5.20   | 0.0226073 | 1.91   | 7.09    | 1.58   | 3.83   | 1.95   | 4.98    | 4.12   | 3.67   |
| GOLGA8H    | 1.31  | 1.38     | 6.52   | 0.010643  | 1.06   | 2.58    | 1.24   | 2.69   | 1.26   | 5.29    | 2.37   | 4.07   |
| GOLGA8N    | 1.36  | 2.06     | 6.39   | 0.0114746 | 1.59   | 9.43    | 1.40   | 3.27   | 3.25   | 5.06    | 3.05   | 6.42   |
| GPNMB      | 2.06  | 8.59     | 6.96   | 0.00832   | 77.89  | 720.09  | 80.82  | 340.57 | 213.91 | 1331.67 | 147.54 | 165.85 |
| GPRIN3     | 1.32  | 5.41     | 8.46   | 0.0036333 | 14.18  | 44.48   | 34.22  | 43.09  | 22.80  | 88.46   | 26.54  | 66.75  |
| GPX3       | 3.39  | 4.45     | 15.14  | 9.963E-05 | 3.45   | 50.39   | 3.49   | 20.30  | 5.10   | 52.36   | 2.73   | 37.73  |
| HBEGF      | 1.17  | 7.75     | 3.91   | 0.0479099 | 102.97 | 656.85  | 64.55  | 107.07 | 100.17 | 189.46  | 213.23 | 290.62 |
| HDGFRP3    | 1.51  | 2.06     | 7.85   | 0.0050803 | 1.41   | 5.04    | 3.23   | 9.93   | 1.44   | 4.66    | 2.59   | 4.86   |
| HGSNAT     | 1.13  | 5.87     | 7.68   | 0.0055752 | 33.56  | 80.36   | 32.64  | 45.22  | 38.91  | 113.61  | 36.83  | 87.54  |
| HLA-DOA    | 1.37  | 7.40     | 7.22   | 0.0071983 | 121.53 | 243.25  | 76.08  | 139.37 | 120.96 | 427.23  | 50.16  | 171.10 |
| HSD3B7     | 1.03  | 5.36     | 4.58   | 0.032318  | 16.90  | 41.26   | 39.63  | 67.64  | 21.09  | 94.77   | 24.47  | 22.98  |

|          |      |      |       |           |        |         |        |        |        |        |        |        |
|----------|------|------|-------|-----------|--------|---------|--------|--------|--------|--------|--------|--------|
| HSPA1A   | 1.29 | 7.90 | 4.98  | 0.0256933 | 245.29 | 510.52  | 123.07 | 461.79 | 153.22 | 267.51 | 40.36  | 104.72 |
| HSPA1B   | 1.66 | 6.19 | 6.17  | 0.0129768 | 28.36  | 276.10  | 16.78  | 44.70  | 32.41  | 77.51  | 39.57  | 70.02  |
| ICOSLG   | 1.16 | 5.52 | 9.03  | 0.00265   | 23.79  | 70.29   | 39.61  | 53.29  | 24.10  | 69.65  | 27.52  | 58.97  |
| IFITM10  | 1.19 | 4.11 | 5.66  | 0.017309  | 9.02   | 16.79   | 11.95  | 27.14  | 5.59   | 39.83  | 14.05  | 13.56  |
| IL32     | 1.23 | 3.70 | 3.88  | 0.04881   | 8.35   | 30.58   | 5.48   | 15.09  | 4.19   | 24.46  | 11.66  | 4.41   |
| ITGB5    | 1.31 | 4.60 | 6.95  | 0.0083868 | 18.67  | 33.95   | 6.00   | 24.48  | 20.95  | 57.49  | 11.44  | 21.62  |
| KIAA0753 | 1.01 | 1.94 | 4.68  | 0.0305964 | 2.28   | 7.12    | 3.28   | 5.43   | 3.35   | 5.11   | 1.36   | 2.85   |
| LGMN     | 1.32 | 8.18 | 5.29  | 0.0214195 | 213.03 | 436.83  | 54.40  | 278.99 | 153.73 | 716.74 | 271.26 | 197.83 |
| LILRB5   | 1.11 | 3.31 | 4.49  | 0.0340801 | 4.16   | 5.00    | 8.40   | 22.29  | 6.12   | 19.14  | 4.37   | 9.38   |
| LMNA     | 1.40 | 8.25 | 6.33  | 0.0118743 | 114.85 | 375.37  | 228.73 | 879.02 | 95.66  | 312.38 | 202.17 | 228.35 |
| MKI67    | 1.61 | 2.99 | 4.38  | 0.0363408 | 2.55   | 9.59    | 1.00   | 5.46   | 15.19  | 24.51  | 1.34   | 3.60   |
| MMP14    | 1.17 | 6.20 | 7.11  | 0.0076604 | 32.67  | 130.72  | 24.61  | 69.06  | 57.68  | 116.14 | 73.92  | 83.22  |
| MMP19    | 1.43 | 7.68 | 5.14  | 0.0233469 | 59.52  | 307.47  | 33.97  | 167.31 | 171.42 | 492.44 | 258.59 | 151.62 |
| MMP9     | 2.10 | 6.41 | 5.61  | 0.0178226 | 17.78  | 123.07  | 3.65   | 83.95  | 45.88  | 175.23 | 173.32 | 55.51  |
| MOB3B    | 1.84 | 3.73 | 5.98  | 0.014496  | 2.73   | 5.76    | 9.90   | 18.76  | 2.14   | 43.93  | 5.96   | 16.29  |
| MTSS1    | 1.40 | 4.94 | 6.95  | 0.0083896 | 15.30  | 62.21   | 7.00   | 26.85  | 14.27  | 49.38  | 39.06  | 32.16  |
| NDRG1    | 1.09 | 6.60 | 8.46  | 0.0036208 | 47.35  | 105.33  | 69.94  | 163.68 | 60.61  | 139.64 | 70.42  | 120.65 |
| NEDD9    | 1.20 | 4.34 | 7.01  | 0.0080841 | 9.08   | 25.88   | 5.80   | 18.58  | 21.09  | 31.99  | 16.47  | 32.93  |
| NLRP1    | 1.14 | 4.83 | 7.79  | 0.0052476 | 10.75  | 43.57   | 19.85  | 31.00  | 15.29  | 33.91  | 26.82  | 45.61  |
| NUAK2    | 1.00 | 2.49 | 4.17  | 0.0412271 | 2.06   | 7.84    | 5.95   | 4.18   | 2.28   | 8.80   | 5.48   | 8.36   |
| PAPSS2   | 1.27 | 5.11 | 5.89  | 0.0151965 | 10.40  | 26.52   | 33.99  | 50.73  | 18.24  | 90.18  | 16.23  | 29.41  |
| PC       | 1.53 | 2.84 | 8.93  | 0.0027992 | 3.08   | 7.27    | 3.72   | 13.08  | 5.86   | 12.92  | 2.34   | 8.97   |
| PCYOX1   | 1.01 | 3.10 | 4.63  | 0.0314391 | 5.98   | 16.18   | 3.91   | 5.75   | 8.41   | 16.30  | 3.95   | 8.41   |
| PDE3B    | 1.10 | 2.37 | 4.52  | 0.0335114 | 1.56   | 3.49    | 3.23   | 4.60   | 3.03   | 8.83   | 4.98   | 11.37  |
| PDE4A    | 1.40 | 5.91 | 9.24  | 0.0023664 | 19.46  | 96.73   | 34.24  | 60.69  | 29.95  | 108.61 | 52.77  | 80.10  |
| PHLPP1   | 1.14 | 1.80 | 5.41  | 0.0200142 | 1.52   | 3.71    | 4.43   | 6.05   | 1.38   | 5.04   | 1.90   | 3.69   |
| PIK3IP1  | 1.25 | 3.30 | 4.25  | 0.0393031 | 5.39   | 26.26   | 6.81   | 7.07   | 3.03   | 19.30  | 5.85   | 5.83   |
| PLD2     | 1.22 | 4.86 | 7.79  | 0.0052641 | 11.70  | 53.23   | 21.95  | 36.39  | 14.00  | 45.74  | 22.48  | 26.58  |
| PMP22    | 1.38 | 3.78 | 5.31  | 0.0211819 | 5.48   | 20.65   | 2.07   | 6.10   | 11.00  | 32.61  | 13.32  | 18.47  |
| PPARD    | 1.07 | 6.43 | 6.48  | 0.0108956 | 29.51  | 111.51  | 54.47  | 92.99  | 63.51  | 174.04 | 78.63  | 85.44  |
| PROS1    | 1.24 | 2.33 | 4.84  | 0.0278714 | 2.20   | 4.77    | 1.93   | 3.34   | 3.82   | 15.13  | 2.87   | 6.02   |
| PRUNE    | 1.13 | 2.11 | 5.48  | 0.0192015 | 3.58   | 5.91    | 3.88   | 5.30   | 2.83   | 7.93   | 1.09   | 4.05   |
| RGCC     | 1.42 | 7.29 | 10.28 | 0.0013463 | 80.79  | 234.92  | 73.98  | 255.32 | 69.73  | 233.65 | 120.60 | 180.89 |
| RHBDD2   | 1.04 | 4.66 | 7.06  | 0.0078964 | 15.42  | 28.04   | 13.78  | 27.97  | 11.86  | 32.79  | 25.95  | 45.81  |
| RNASE4   | 1.72 | 2.33 | 7.37  | 0.0066422 | 2.08   | 5.23    | 0.97   | 3.58   | 1.65   | 8.43   | 5.14   | 12.90  |
| RPS6KA2  | 1.27 | 2.39 | 5.79  | 0.0160836 | 1.76   | 4.09    | 1.88   | 5.51   | 5.03   | 7.59   | 3.67   | 11.95  |
| SATB1    | 2.20 | 6.05 | 10.68 | 0.0010825 | 16.61  | 71.69   | 17.58  | 54.52  | 17.17  | 188.97 | 39.37  | 123.93 |
| SDC2     | 2.75 | 4.74 | 8.85  | 0.0029277 | 3.25   | 7.35    | 8.17   | 51.18  | 3.04   | 86.80  | 8.13   | 45.95  |
| SDHAP1   | 1.03 | 2.43 | 4.89  | 0.0269922 | 2.29   | 3.49    | 4.67   | 7.89   | 3.72   | 9.68   | 3.12   | 8.02   |
| SDS      | 3.05 | 5.94 | 12.42 | 0.0004254 | 12.04  | 83.13   | 8.68   | 47.34  | 8.49   | 215.75 | 18.03  | 96.30  |
| SEL1L3   | 1.37 | 4.50 | 8.30  | 0.0039699 | 6.51   | 20.50   | 22.57  | 35.79  | 8.54   | 33.34  | 16.07  | 37.12  |
| SERINC5  | 1.59 | 4.78 | 7.79  | 0.0052633 | 7.18   | 24.59   | 26.54  | 43.93  | 9.20   | 68.50  | 12.97  | 26.04  |
| SERPINE1 | 1.45 | 4.91 | 7.44  | 0.0063772 | 11.48  | 38.87   | 7.68   | 38.00  | 19.67  | 69.12  | 29.75  | 25.34  |
| SERPINF1 | 1.40 | 3.79 | 4.02  | 0.0450444 | 4.72   | 15.69   | 1.92   | 4.71   | 4.67   | 12.78  | 20.55  | 45.15  |
| SERTAD3  | 1.10 | 2.81 | 6.18  | 0.0129115 | 3.76   | 6.25    | 7.03   | 10.43  | 4.21   | 10.92  | 3.11   | 10.15  |
| SH3BP5   | 1.47 | 4.26 | 6.65  | 0.0099153 | 3.64   | 19.74   | 16.56  | 26.83  | 8.92   | 48.73  | 13.09  | 15.85  |
| SH3D21   | 1.16 | 2.61 | 4.30  | 0.0380446 | 1.09   | 7.81    | 4.24   | 10.81  | 6.30   | 10.66  | 4.21   | 3.63   |
| SH3PXD2B | 1.28 | 4.98 | 7.26  | 0.0070433 | 13.46  | 27.05   | 35.06  | 39.08  | 13.79  | 64.78  | 13.80  | 44.99  |
| SHB      | 1.46 | 2.71 | 7.98  | 0.0047303 | 1.67   | 8.75    | 3.04   | 7.77   | 3.69   | 11.68  | 6.62   | 8.97   |
| SIK1     | 1.09 | 7.35 | 5.41  | 0.0200518 | 78.53  | 352.45  | 86.39  | 89.93  | 112.74 | 235.98 | 111.77 | 237.24 |
| SIPA1L1  | 1.02 | 6.99 | 4.35  | 0.0369787 | 39.83  | 65.62   | 134.00 | 179.16 | 55.47  | 158.81 | 104.23 | 278.71 |
| SLC15A2  | 1.04 | 1.96 | 4.42  | 0.0356006 | 3.69   | 5.57    | 4.82   | 4.01   | 1.16   | 5.48   | 1.55   | 4.78   |
| SLC25A29 | 1.66 | 2.80 | 8.51  | 0.0035352 | 2.99   | 14.89   | 4.18   | 11.48  | 2.87   | 12.15  | 2.72   | 4.61   |
| SLC2A1   | 1.33 | 2.98 | 8.04  | 0.0045668 | 2.78   | 11.94   | 3.93   | 8.34   | 5.37   | 10.17  | 6.17   | 14.47  |
| SLC2A3   | 1.27 | 9.01 | 7.44  | 0.0063856 | 215.55 | 1116.23 | 296.31 | 519.22 | 324.63 | 727.30 | 341.14 | 586.27 |
| SLC40A1  | 1.59 | 2.68 | 4.37  | 0.0365004 | 3.84   | 19.97   | 1.14   | 2.29   | 3.85   | 16.02  | 1.66   | 3.08   |
| SLC6A8   | 1.01 | 3.31 | 4.37  | 0.0365939 | 5.86   | 15.19   | 6.35   | 9.19   | 6.07   | 24.23  | 6.03   | 6.58   |
| SLCO4A1  | 1.12 | 2.49 | 4.82  | 0.0281686 | 1.70   | 7.43    | 2.29   | 9.11   | 4.29   | 7.47   | 7.35   | 5.19   |
| SMOX     | 1.55 | 4.42 | 8.34  | 0.003877  | 9.64   | 28.27   | 6.50   | 15.49  | 10.99  | 54.52  | 14.50  | 31.13  |
| SNX33    | 1.16 | 3.27 | 4.35  | 0.0370465 | 2.14   | 17.92   | 4.21   | 6.77   | 10.20  | 19.92  | 7.63   | 8.36   |



|           |       |      |       |           |         |        |         |        |        |         |         |         |
|-----------|-------|------|-------|-----------|---------|--------|---------|--------|--------|---------|---------|---------|
| SOCS6     | 1.32  | 3.76 | 5.92  | 0.0150088 | 4.78    | 10.08  | 9.96    | 11.40  | 6.71   | 36.23   | 7.26    | 21.35   |
| SPP1      | 2.04  | 9.70 | 4.29  | 0.038253  | 65.76   | 210.82 | 300.38  | 848.09 | 401.65 | 4423.37 | 93.97   | 287.29  |
| SPRY2     | 1.82  | 3.88 | 9.89  | 0.0016589 | 5.40    | 29.63  | 8.37    | 18.50  | 3.10   | 26.21   | 10.53   | 16.14   |
| SSBP2     | 1.14  | 2.42 | 5.70  | 0.0169835 | 3.73    | 12.12  | 2.35    | 4.81   | 4.21   | 7.74    | 2.76    | 5.34    |
| ST6GALNAC | 1.00  | 3.24 | 5.70  | 0.0169476 | 7.13    | 7.81   | 6.09    | 14.59  | 7.54   | 16.20   | 4.16    | 11.76   |
| STAT4     | 1.49  | 4.11 | 5.20  | 0.0226181 | 2.81    | 8.83   | 9.28    | 21.29  | 10.60  | 60.24   | 9.58    | 14.71   |
| SULF2     | 1.08  | 7.19 | 5.85  | 0.0156036 | 57.55   | 122.69 | 145.69  | 255.93 | 47.43  | 188.64  | 147.93  | 200.24  |
| SYTL3     | 1.32  | 3.99 | 6.06  | 0.013846  | 5.75    | 25.42  | 5.42    | 9.62   | 11.63  | 39.66   | 12.08   | 17.66   |
| TARSL2    | 1.39  | 2.44 | 7.86  | 0.005045  | 1.73    | 6.44   | 4.67    | 7.62   | 4.01   | 7.71    | 2.19    | 8.89    |
| TBC1D30   | 1.16  | 2.44 | 4.05  | 0.0441834 | 1.96    | 8.90   | 3.41    | 4.08   | 2.41   | 13.81   | 4.93    | 3.95    |
| TFDP2     | 1.21  | 2.73 | 4.47  | 0.0344903 | 2.09    | 11.82  | 1.74    | 3.17   | 7.06   | 13.05   | 5.55    | 8.73    |
| TFRC      | 1.21  | 7.96 | 3.88  | 0.0487552 | 87.77   | 517.57 | 84.18   | 107.07 | 132.85 | 589.88  | 255.81  | 215.93  |
| THBD      | 1.46  | 7.18 | 10.00 | 0.0015666 | 85.48   | 206.19 | 89.17   | 143.30 | 55.36  | 237.11  | 77.86   | 267.60  |
| THBS1     | 1.83  | 9.73 | 5.46  | 0.0194654 | 215.16  | 664.13 | 41.40   | 287.48 | 722.59 | 2364.18 | 756.60  | 1736.32 |
| THBS3     | 1.00  | 3.52 | 6.16  | 0.01304   | 6.16    | 20.46  | 7.18    | 10.31  | 9.15   | 17.49   | 7.62    | 13.65   |
| TMEM2     | 1.02  | 6.65 | 6.73  | 0.0094727 | 49.67   | 127.99 | 55.31   | 89.14  | 71.51  | 195.56  | 85.76   | 127.05  |
| TMEM91    | 1.02  | 1.80 | 4.18  | 0.0410194 | 2.90    | 8.94   | 1.98    | 2.57   | 2.01   | 4.84    | 1.81    | 3.19    |
| TNFRSF12A | 1.46  | 1.75 | 6.50  | 0.0107664 | 1.15    | 2.77   | 1.74    | 3.07   | 2.13   | 9.23    | 1.58    | 4.89    |
| TNFRSF21  | 1.75  | 4.42 | 5.27  | 0.0216593 | 7.70    | 28.19  | 5.14    | 5.66   | 4.62   | 66.76   | 15.39   | 37.22   |
| TNFSF8    | 1.06  | 5.13 | 5.38  | 0.0203607 | 18.73   | 32.05  | 15.55   | 26.28  | 23.95  | 89.33   | 26.78   | 47.81   |
| TREM1     | 1.14  | 6.58 | 5.00  | 0.0252843 | 23.60   | 53.27  | 104.65  | 126.07 | 41.15  | 198.53  | 77.50   | 141.80  |
| TREM2     | 1.37  | 4.79 | 5.60  | 0.0179386 | 15.24   | 26.86  | 5.69    | 37.60  | 41.40  | 64.76   | 8.22    | 21.29   |
| TRIM36    | 1.10  | 2.23 | 4.59  | 0.0322106 | 1.50    | 6.33   | 5.63    | 10.39  | 3.12   | 4.04    | 2.08    | 4.46    |
| TRIM66    | 1.13  | 2.21 | 5.46  | 0.0194857 | 1.59    | 7.69   | 4.12    | 4.61   | 4.70   | 6.82    | 1.87    | 5.67    |
| TSPYL2    | 1.23  | 6.17 | 5.69  | 0.0170967 | 24.39   | 140.15 | 23.78   | 47.45  | 49.41  | 137.05  | 77.99   | 74.47   |
| TTYH2     | 1.14  | 5.10 | 7.00  | 0.0081329 | 18.31   | 58.05  | 13.19   | 30.38  | 21.65  | 62.10   | 33.85   | 37.07   |
| UBD       | 2.70  | 5.20 | 5.75  | 0.0164654 | 6.28    | 155.31 | 2.20    | 14.24  | 4.61   | 56.32   | 40.85   | 15.80   |
| VEGFA     | 1.73  | 8.12 | 7.86  | 0.0050553 | 87.57   | 608.54 | 75.92   | 136.50 | 127.28 | 456.90  | 194.72  | 532.36  |
| VMO1      | 2.17  | 3.08 | 12.07 | 0.0005122 | 3.78    | 19.70  | 3.60    | 13.87  | 1.74   | 11.86   | 3.32    | 9.91    |
| WIPI1     | 1.15  | 5.05 | 4.12  | 0.0424302 | 13.62   | 53.12  | 7.55    | 14.27  | 28.10  | 85.91   | 29.99   | 31.99   |
| YPEL3     | 1.01  | 4.69 | 4.64  | 0.0312608 | 24.18   | 66.76  | 12.16   | 15.96  | 11.59  | 29.11   | 16.70   | 30.49   |
| ZBTB46    | 1.65  | 2.34 | 8.29  | 0.0039764 | 2.28    | 5.99   | 1.34    | 5.86   | 1.61   | 9.52    | 5.67    | 8.15    |
| ZMIZ1     | 1.00  | 7.79 | 5.95  | 0.0147505 | 70.77   | 228.25 | 208.67  | 309.09 | 131.10 | 333.58  | 210.74  | 279.14  |
| ZMYND15   | 1.26  | 4.02 | 6.32  | 0.0119295 | 4.81    | 19.36  | 18.91   | 30.61  | 5.03   | 22.18   | 13.44   | 15.32   |
| ZNF358    | 1.18  | 2.52 | 4.36  | 0.0368616 | 3.87    | 12.92  | 1.61    | 3.29   | 2.10   | 8.43    | 7.18    | 6.68    |
| ZNF395    | 1.28  | 4.13 | 8.10  | 0.004438  | 6.68    | 32.36  | 8.37    | 16.54  | 11.07  | 22.44   | 15.06   | 27.73   |
| ZNF426    | 1.02  | 1.73 | 4.74  | 0.0294102 | 3.01    | 4.66   | 1.23    | 3.46   | 2.02   | 6.48    | 2.58    | 3.10    |
| ZNF766    | 1.10  | 2.01 | 5.41  | 0.0200007 | 2.61    | 7.62   | 1.27    | 3.83   | 2.73   | 4.64    | 4.01    | 5.68    |
| 41155     | -1.52 | 4.05 | 9.24  | 0.0023616 | 24.62   | 13.34  | 21.71   | 8.02   | 22.87  | 3.40    | 25.81   | 12.45   |
| AMER1     | -1.82 | 2.23 | 8.75  | 0.0030906 | 3.83    | 1.40   | 11.95   | 1.64   | 5.21   | 1.76    | 8.16    | 3.02    |
| AMIGO2    | -1.24 | 2.28 | 7.52  | 0.006107  | 7.26    | 3.33   | 8.12    | 2.52   | 6.82   | 2.92    | 4.89    | 2.58    |
| ANKRD22   | -1.04 | 7.49 | 7.10  | 0.0077046 | 227.80  | 140.00 | 254.99  | 175.23 | 237.82 | 70.51   | 228.70  | 100.47  |
| BOLA3     | -1.27 | 1.84 | 6.61  | 0.0101563 | 7.13    | 1.86   | 4.03    | 2.84   | 5.60   | 1.93    | 3.27    | 1.53    |
| BRIX1     | -1.06 | 3.01 | 6.40  | 0.0114355 | 10.17   | 5.91   | 14.31   | 4.76   | 9.76   | 3.52    | 8.92    | 6.82    |
| C20orf24  | -1.03 | 1.90 | 4.55  | 0.032894  | 7.32    | 2.92   | 6.84    | 2.67   | 2.93   | 1.91    | 3.09    | 1.73    |
| CASP5     | -1.38 | 4.33 | 8.49  | 0.0035642 | 34.05   | 16.67  | 16.11   | 6.10   | 32.48  | 9.12    | 32.53   | 13.42   |
| CCDC86    | -1.15 | 4.04 | 6.66  | 0.0098649 | 32.27   | 12.88  | 22.83   | 13.72  | 16.44  | 10.36   | 17.55   | 4.73    |
| CCL8      | -1.44 | 7.43 | 5.42  | 0.0199475 | 230.70  | 94.23  | 90.14   | 80.04  | 217.63 | 111.63  | 510.84  | 43.02   |
| CD274     | -1.12 | 6.94 | 6.54  | 0.0105194 | 113.39  | 46.26  | 153.17  | 154.53 | 182.25 | 68.00   | 204.67  | 62.04   |
| CMPK2     | -1.66 | 6.34 | 9.11  | 0.0025437 | 116.96  | 36.98  | 72.76   | 26.08  | 107.70 | 19.42   | 180.61  | 87.90   |
| CX3CR1    | -1.45 | 3.34 | 4.72  | 0.0297538 | 28.52   | 5.95   | 9.31    | 1.75   | 5.00   | 2.60    | 14.69   | 12.90   |
| CXCL10    | -1.71 | 9.79 | 6.91  | 0.008553  | 1211.64 | 399.51 | 1121.31 | 717.56 | 518.16 | 144.65  | 2601.03 | 386.25  |
| DOLPP1    | -1.38 | 2.34 | 7.62  | 0.0057724 | 10.08   | 4.55   | 6.00    | 2.77   | 6.82   | 1.58    | 5.84    | 2.59    |
| EDN1      | -1.21 | 4.45 | 3.89  | 0.0486204 | 32.09   | 15.69  | 26.87   | 47.70  | 17.71  | 3.90    | 25.25   | 5.22    |
| ETV7      | -1.30 | 4.32 | 6.51  | 0.0106973 | 26.76   | 4.09   | 41.12   | 21.14  | 16.77  | 9.05    | 25.56   | 15.00   |
| FAHD1     | -1.04 | 3.06 | 5.42  | 0.0198604 | 14.44   | 4.70   | 8.49    | 2.57   | 12.11  | 7.93    | 8.58    | 7.30    |
| FDX1L     | -1.05 | 1.70 | 4.99  | 0.0254416 | 6.15    | 2.24   | 4.56    | 2.92   | 3.30   | 1.11    | 3.15    | 2.18    |
| FFAR2     | -1.57 | 5.10 | 6.52  | 0.0106658 | 50.23   | 8.07   | 36.96   | 32.57  | 21.18  | 6.57    | 90.62   | 27.46   |
| FZD5      | -1.10 | 3.29 | 6.75  | 0.0093507 | 15.82   | 4.13   | 13.07   | 8.59   | 14.03  | 5.35    | 9.72    | 6.83    |
| GAPT      | -1.12 | 4.33 | 4.36  | 0.0367633 | 36.34   | 12.05  | 16.29   | 8.09   | 28.03  | 4.98    | 20.82   | 34.32   |

|          |       |      |       |           |        |        |        |        |        |        |         |        |
|----------|-------|------|-------|-----------|--------|--------|--------|--------|--------|--------|---------|--------|
| GIMAP7   | -1.35 | 5.26 | 10.14 | 0.0014541 | 47.95  | 18.57  | 68.16  | 28.15  | 44.66  | 15.40  | 58.65   | 25.33  |
| GIMAP8   | -1.01 | 5.48 | 5.86  | 0.0154615 | 35.70  | 37.09  | 46.67  | 21.55  | 87.82  | 20.83  | 69.55   | 36.91  |
| GMPR     | -1.18 | 3.19 | 5.72  | 0.0167438 | 12.20  | 8.11   | 6.14   | 2.21   | 13.41  | 5.35   | 18.01   | 7.17   |
| GPBAR1   | -1.12 | 4.45 | 5.49  | 0.0191745 | 40.58  | 16.18  | 37.53  | 16.24  | 18.39  | 4.73   | 20.26   | 21.03  |
| GRIN3A   | -1.39 | 3.67 | 9.03  | 0.0026569 | 13.54  | 5.95   | 25.71  | 9.37   | 18.14  | 6.99   | 15.83   | 5.50   |
| HERC5    | -1.04 | 4.85 | 4.84  | 0.0277677 | 28.23  | 17.39  | 27.68  | 9.72   | 27.64  | 12.99  | 68.88   | 38.00  |
| IFIH1    | -1.12 | 6.30 | 6.84  | 0.0089033 | 86.84  | 57.71  | 66.35  | 47.27  | 108.74 | 36.63  | 176.24  | 49.87  |
| IFIT1    | -1.74 | 4.70 | 5.46  | 0.0194801 | 25.38  | 8.87   | 8.06   | 3.43   | 37.12  | 5.71   | 88.06   | 30.52  |
| IFIT2    | -1.84 | 7.42 | 9.72  | 0.0018271 | 339.18 | 75.78  | 129.51 | 99.25  | 240.13 | 39.01  | 365.99  | 85.30  |
| IFIT3    | -1.98 | 7.67 | 11.38 | 0.000741  | 325.02 | 54.71  | 249.20 | 79.92  | 229.57 | 60.22  | 487.02  | 141.49 |
| IFIT5    | -1.17 | 3.64 | 4.96  | 0.0258846 | 21.49  | 2.42   | 14.89  | 7.05   | 9.22   | 8.88   | 21.42   | 13.78  |
| IFITM1   | -1.12 | 7.50 | 4.13  | 0.0422003 | 249.82 | 176.15 | 79.02  | 46.62  | 267.30 | 56.08  | 384.36  | 191.31 |
| IPCEF1   | -1.03 | 3.79 | 5.64  | 0.0175994 | 14.92  | 10.08  | 22.88  | 13.05  | 24.04  | 5.38   | 11.96   | 7.82   |
| ISG15    | -1.29 | 6.22 | 7.30  | 0.0068873 | 147.14 | 52.51  | 47.24  | 36.36  | 91.83  | 29.37  | 144.90  | 46.35  |
| ISG20    | -1.00 | 5.46 | 6.42  | 0.0112658 | 54.27  | 34.52  | 43.96  | 27.42  | 45.71  | 18.01  | 91.59   | 36.58  |
| LY6E     | -1.00 | 8.10 | 4.96  | 0.025933  | 422.24 | 239.54 | 183.93 | 117.38 | 324.90 | 110.81 | 526.13  | 263.73 |
| MAP3K7CL | -1.40 | 4.94 | 7.34  | 0.0067462 | 30.03  | 19.97  | 64.34  | 29.21  | 41.59  | 18.78  | 35.48   | 5.12   |
| MINA     | -1.79 | 2.39 | 10.78 | 0.0010247 | 7.42   | 2.16   | 6.06   | 2.39   | 9.02   | 2.58   | 9.82    | 2.07   |
| MRPL1    | -1.42 | 1.73 | 8.36  | 0.0038391 | 4.36   | 1.71   | 5.82   | 2.09   | 5.08   | 2.09   | 3.64    | 1.22   |
| MRPS26   | -1.03 | 2.02 | 4.72  | 0.0297303 | 8.01   | 2.88   | 6.54   | 3.64   | 3.14   | 2.04   | 4.00    | 1.76   |
| MX1      | -1.45 | 8.78 | 8.37  | 0.0038071 | 702.43 | 240.18 | 378.06 | 168.33 | 621.25 | 147.77 | 833.81  | 415.83 |
| NME1     | -1.11 | 2.91 | 6.26  | 0.0123523 | 14.41  | 3.52   | 8.74   | 5.60   | 10.74  | 4.07   | 7.08    | 5.37   |
| NMI      | -1.02 | 6.33 | 7.63  | 0.0057355 | 115.91 | 43.57  | 107.50 | 73.22  | 91.70  | 34.62  | 110.08  | 66.75  |
| NOC3L    | -1.10 | 2.38 | 5.77  | 0.0163416 | 4.81   | 1.40   | 8.39   | 4.08   | 7.17   | 3.99   | 7.11    | 4.14   |
| OAS1     | -1.11 | 7.12 | 6.58  | 0.010326  | 222.32 | 95.06  | 105.16 | 67.32  | 172.29 | 59.84  | 262.36  | 128.48 |
| OAS2     | -1.27 | 7.94 | 8.49  | 0.0035724 | 347.68 | 120.19 | 267.18 | 120.26 | 336.93 | 112.37 | 413.87  | 239.22 |
| OAS3     | -1.42 | 9.08 | 7.84  | 0.005117  | 803.55 | 271.52 | 451.41 | 216.10 | 793.23 | 175.90 | 1045.75 | 557.38 |
| P2RY13   | -1.73 | 4.20 | 8.27  | 0.0040366 | 28.39  | 7.16   | 47.38  | 16.56  | 12.11  | 3.05   | 23.01   | 8.59   |
| P2RY6    | -1.07 | 4.63 | 6.21  | 0.0126853 | 52.77  | 26.83  | 23.63  | 10.33  | 27.11  | 11.14  | 29.79   | 16.83  |
| PDLIM2   | -1.02 | 3.93 | 6.57  | 0.0103855 | 25.50  | 13.64  | 18.20  | 12.45  | 15.84  | 6.80   | 21.26   | 7.94   |
| PDSS1    | -1.09 | 2.86 | 5.30  | 0.0213308 | 9.49   | 5.19   | 7.05   | 5.08   | 16.92  | 3.45   | 6.64    | 3.88   |
| PEX3     | -1.03 | 2.18 | 4.68  | 0.0305035 | 6.25   | 1.21   | 4.19   | 3.84   | 7.29   | 4.81   | 5.55    | 2.52   |
| PLAC8    | -1.95 | 5.88 | 9.11  | 0.0025404 | 131.59 | 24.33  | 54.53  | 14.02  | 126.78 | 13.52  | 52.88   | 51.78  |
| POLR3D   | -1.09 | 4.15 | 6.58  | 0.0103101 | 30.16  | 12.73  | 34.16  | 14.05  | 16.83  | 9.95   | 16.32   | 7.68   |
| PPM1K    | -1.34 | 2.74 | 4.48  | 0.034244  | 6.30   | 4.93   | 3.40   | 3.76   | 16.01  | 1.56   | 13.62   | 3.57   |
| PSMG1    | -1.04 | 2.91 | 5.80  | 0.0160487 | 12.02  | 2.42   | 10.00  | 6.43   | 9.46   | 5.38   | 8.10    | 5.68   |
| PVT1     | -1.09 | 1.81 | 4.56  | 0.032815  | 2.81   | 1.21   | 2.92   | 1.55   | 5.13   | 2.26   | 7.92    | 3.74   |
| RRP9     | -1.01 | 3.17 | 6.72  | 0.0095392 | 14.77  | 5.30   | 11.36  | 6.87   | 11.63  | 6.57   | 10.06   | 4.89   |
| RSAD2    | -2.16 | 7.07 | 9.51  | 0.002038  | 176.01 | 39.06  | 75.74  | 30.18  | 236.11 | 27.25  | 393.50  | 95.82  |
| SIGLEC11 | -1.13 | 5.83 | 7.29  | 0.0069452 | 94.49  | 49.41  | 75.51  | 36.54  | 94.79  | 40.00  | 45.17   | 18.44  |
| SLC6A12  | -1.03 | 5.02 | 5.33  | 0.0209586 | 37.34  | 17.01  | 71.92  | 40.37  | 33.07  | 11.28  | 29.36   | 19.36  |
| SMYD5    | -1.02 | 3.27 | 5.02  | 0.0250475 | 15.98  | 2.92   | 16.59  | 9.07   | 9.65   | 7.37   | 8.83    | 6.27   |
| SOCS1    | -1.14 | 2.42 | 6.02  | 0.0141718 | 9.38   | 4.40   | 5.82   | 3.61   | 9.39   | 2.83   | 4.71    | 2.27   |
| SPRYD7   | -1.03 | 1.42 | 5.21  | 0.022465  | 4.78   | 1.97   | 2.54   | 1.49   | 3.62   | 2.33   | 3.18    | 1.18   |
| TACO1    | -1.22 | 3.01 | 5.63  | 0.0176535 | 10.19  | 3.07   | 14.14  | 10.16  | 9.97   | 6.72   | 7.78    | 1.79   |
| TIFA     | -1.58 | 4.84 | 8.35  | 0.0038593 | 38.95  | 10.53  | 73.98  | 28.91  | 32.48  | 11.11  | 24.12   | 8.29   |
| TMA16    | -1.40 | 2.40 | 7.81  | 0.0051887 | 8.76   | 2.39   | 9.32   | 1.94   | 5.31   | 3.28   | 6.79    | 3.95   |
| TNFSF10  | -1.28 | 7.61 | 7.51  | 0.0061487 | 361.52 | 184.79 | 229.78 | 116.10 | 175.24 | 51.37  | 323.94  | 123.88 |
| USP18    | -2.14 | 5.33 | 7.87  | 0.005033  | 63.09  | 25.39  | 13.44  | 3.17   | 64.95  | 7.32   | 115.50  | 28.02  |
| UTP20    | -1.31 | 3.27 | 7.51  | 0.0061251 | 9.99   | 5.00   | 17.53  | 10.04  | 15.11  | 3.45   | 11.25   | 4.52   |
| WARS2    | -1.12 | 1.79 | 5.80  | 0.0159982 | 4.31   | 1.82   | 4.40   | 3.59   | 4.88   | 1.14   | 4.59    | 2.51   |
| XPA      | -1.01 | 3.41 | 5.87  | 0.0154363 | 18.41  | 5.95   | 9.48   | 5.51   | 13.15  | 5.76   | 15.21   | 11.08  |

**Table S2. Functional enrichment pathways in treatment-specific signature genes.**

| Category        | Term                                                        | Count        | %        | PValue        | Genes                                                                | Fold Enrichm        | Bonferroni        | Benjamini        | FDR        |
|-----------------|-------------------------------------------------------------|--------------|----------|---------------|----------------------------------------------------------------------|---------------------|-------------------|------------------|------------|
| GOTERM_BP_ALL   | GO:0002376~immune system process                            | 33           | 15.27778 | 1.39E-06      | IFIH1, MMP9, EDN1, OAS3, RSAD2, CCL8, ACP5, OAS1, IL32, OAS2, CXCL10 | 2.55060942          | 0.00230315        | 0.00230315       | 0.00234    |
| GOTERM_BP_ALL   | GO:0042221~response to chemical stimulus                    | 37           | 17.12963 | 5.9064E-06    | A2M, SLC15A2, EDN1, PDE3B, ACP5, CCL8, FOXO1, HSPA1A, GRIN3A, H      | 2.22798957          | 0.00973919        | 0.00488151       | 0.00993    |
| GOTERM_BP_ALL   | GO:0006955~immune response                                  | 25           | 11.57407 | 8.9681E-06    | IFIH1, OAS3, CCL8, ACP5, RSAD2, IL32, OAS1, OAS2, CXCL10, HLA-DOA,   | 2.79480478          | 0.01475042        | 0.00494118       | 0.01508    |
| GOTERM_BP_ALL   | GO:0050896~response to stimulus                             | 71           | 32.87037 | 2.8626E-05    | PPARD, A2M, NUAK2, SLC15A2, EDN1, PDE3B, FOXO1, GRIN3A, CXCL10       | 1.56387763          | 0.0463271         | 0.0117886        | 0.04813    |
| GOTERM_BP_ALL   | GO:0006950~response to stress                               | 42           | 19.44444 | 3.8647E-05    | IFIH1, PPARD, A2M, NMI, NUAK2, EDN1, CCL8, RSAD2, IL32, HSPA1A, H    | 1.922693            | 0.06203129        | 0.01272607       | 0.06497    |
| GOTERM_BP_ALL   | GO:0001568~blood vessel development                         | 13           | 6.018519 | 8.0439E-05    | SHB, EPAS1, APOE, TNFRSF12A, ZMIZ1, VEGFA, EDN1, MMP19, FOXO1,       | 4.09296309          | 0.12479076        | 0.02197044       | 0.13517    |
| GOTERM_BP_ALL   | GO:0048514~blood vessel morphogenesis                       | 12           | 5.555556 | 9.2519E-05    | SHB, EPAS1, TNFRSF12A, APOE, ZMIZ1, VEGFA, EDN1, MMP19, ANPEP,       | 4.38691632          | 0.14213693        | 0.02166344       | 0.15546    |
| GOTERM_BP_ALL   | GO:0001944~vasculature development                          | 13           | 6.018519 | 0.00010156    | SHB, EPAS1, APOE, TNFRSF12A, ZMIZ1, VEGFA, EDN1, MMP19, FOXO1,       | 3.99512333          | 0.15489041        | 0.0208164        | 0.17064    |
| GOTERM_BP_ALL   | GO:0006952~defense response                                 | 20           | 9.259259 | 0.00037558    | A2M, IFIH1, NMI, C5AR1, SOCS6, RSAD2, CCL8, IL32, COLEC12, NLRP1, C  | 2.50850771          | 0.46337107        | 0.06682351       | 0.62968    |
| GOTERM_BP_ALL   | GO:0001525~angiogenesis                                     | 9            | 4.166667 | 6.65E-04      | SHB, EPAS1, TNFRSF12A, VEGFA, EDN1, MMP19, ANPEP, MMP14, THBS        | 4.69073992          | 0.66794531        | 0.10438582       | 1.11255    |
| GOTERM_BP_ALL   | GO:0030335~positive regulation of cell migration            | 7            | 3.240741 | 0.00101412    | CXCL16, MMP9, VEGFA, EDN1, HBEGF, THBS1, CXCL10                      | 6.06692454          | 0.81385985        | 0.14173417       | 1.69168    |
| GOTERM_BP_ALL   | GO:0032101~regulation of response to external stimulus      | 9            | 4.166667 | 0.00106245    | A2M, SERPINF1, APOE, VEGFA, EDN1, SERPINE1, GRIN3A, THBS1, SPP1      | 4.36622332          | 0.82819959        | 0.13652053       | 1.77163    |
| GOTERM_BP_ALL   | GO:0040017~positive regulation of locomotion                | 7            | 3.240741 | 0.00167024    | CXCL16, MMP9, VEGFA, EDN1, HBEGF, THBS1, CXCL10                      | 5.509758            | 0.93733158        | 0.19189966       | 2.77178    |
| GOTERM_BP_ALL   | GO:0051272~positive regulation of cell motion               | 7            | 3.240741 | 0.00167024    | CXCL16, MMP9, VEGFA, EDN1, HBEGF, THBS1, CXCL10                      | 5.509758            | 0.93733158        | 0.19189966       | 2.77178    |
| GOTERM_BP_ALL   | GO:0042219~cellular amino acid derivative catabolic process | 4            | 1.851852 | 0.00175462    | COLQ, SMOX, PCYOX1, AFMID                                            | 16.2392867          | 0.94552212        | 0.18767463       | 2.90988    |
| GOTERM_BP_ALL   | GO:0048519~negative regulation of biological process        | 38           | 17.59259 | 0.00282406    | PPARD, A2M, IFITM1, NUAK2, HSD3B7, LGMN, EDN1, APOC1, PDE3B, F       | 1.61765522          | 0.99077728        | 0.26831539       | 4.64418    |
| GOTERM_BP_ALL   | GO:0040012~regulation of locomotion                         | 9            | 4.166667 | 0.00346305    | BBS1, APOE, CXCL16, MMP9, VEGFA, EDN1, HBEGF, THBS1, CXCL10          | 3.61577869          | 0.99681158        | 0.30181031       | 5.66648    |
| GOTERM_BP_ALL   | GO:0051270~regulation of cell motion                        | 9            | 4.166667 | 0.00357116    | BBS1, APOE, CXCL16, MMP9, VEGFA, EDN1, HBEGF, THBS1, CXCL10          | 3.59704408          | 0.99733622        | 0.29439983       | 5.83842    |
| GOTERM_BP_ALL   | GO:0009611~response to wounding                             | 16           | 7.407407 | 0.00362032    | A2M, PPARD, NMI, CCL8, CCL18, CXCL10, CD9, THBD, TFRC, SERPINE1, C   | 2.32865244          | 0.9975453         | 0.28385667       | 5.9165     |
| GOTERM_BP_ALL   | GO:0010594~regulation of endothelial cell migration         | 4            | 1.851852 | 0.00393512    | APOE, VEGFA, EDN1, THBS1                                             | 12.3418579          | 0.99854588        | 0.29097239       | 6.41509    |
| GOTERM_BP_ALL   | GO:0010033~response to organic substance                    | 19           | 8.796296 | 0.00555163    | A2M, BAIAP2, SOCS1, FOXO1, ACP5, PDE3B, HSPA1A, COLEC12, GRIN3A      | 2.03272625          | 0.99990142        | 0.36949507       | 8.93648    |
| GOTERM_BP_ALL   | GO:0015758~glucose transport                                | 4            | 1.851852 | 0.00602047    | PPARD, SLC2A3, SLC2A1, EDN1                                          | 10.6395327          | 0.99995487        | 0.37903423       | 9.65571    |
| GOTERM_BP_ALL   | GO:0030334~regulation of cell migration                     | 8            | 3.703704 | 0.00632906    | APOE, CXCL16, MMP9, VEGFA, EDN1, HBEGF, THBS1, CXCL10                | 3.65143726          | 0.99997302        | 0.38010668       | 10.1262    |
| GOTERM_BP_ALL   | GO:0008645~hexose transport                                 | 4            | 1.851852 | 0.00662677    | PPARD, SLC2A3, SLC2A1, EDN1                                          | 10.2848816          | 0.99998358        | 0.3806004        | 10.5779    |
| GOTERM_BP_ALL   | GO:0009605~response to external stimulus                    | 22           | 10.18519 | 0.00715848    | A2M, PPARD, NMI, C5AR1, NUAK2, CCL8, GRIN3A, MMP14, CCL18, CXC       | 1.85667994          | 0.99999324        | 0.39104517       | 11.3794    |
| GOTERM_BP_ALL   | GO:0015749~monosaccharide transport                         | 4            | 1.851852 | 0.00726813    | PPARD, SLC2A3, SLC2A1, EDN1                                          | 9.95311123          | 0.99999437        | 0.38337295       | 11.5438    |
| GOTERM_BP_ALL   | GO:0048523~negative regulation of cellular process          | 34           | 15.74074 | 0.00734041    | A2M, PPARD, IFITM1, NUAK2, HSD3B7, EDN1, APOC1, PDE3B, FOXO1, †      | 1.57990651          | 0.99999501        | 0.37470733       | 11.652     |
| GOTERM_BP_ALL   | GO:0048585~negative regulation of response to stimulus      | 6            | 2.777778 | 0.00947671    | A2M, SERPINF1, APOE, SOCS1, GRIN3A, SPP1                             | 4.62819672          | 0.99999986        | 0.44253874       | 14.7954    |
| <b>Category</b> | <b>Term</b>                                                 | <b>Count</b> | <b>%</b> | <b>PValue</b> | <b>Genes</b>                                                         | <b>Fold Enrichm</b> | <b>Bonferroni</b> | <b>Benjamini</b> | <b>FDR</b> |
| PANTHER_BP_ALL  | BP00156:Interferon-mediated immunity                        | 9            | 4.166667 | 7.8868E-07    | IFIT3, IFIT2, IFIT1, NMI, IFIT5, OAS3, OAS1, OAS2, CXCL10            | 11.8297146          | 1.08E-04          | 1.08E-04         | 9.27E-04   |
| PANTHER_BP_ALL  | BP00148:Immunity and defense                                | 36           | 16.66667 | 1.1555E-06    | PHLPP1, A2M, PPARD, NMI, IFITM1, OAS3, CCL8, ITGB5, OAS1, HSPA1A     | 2.40472888          | 1.58E-04          | 7.92E-05         | 0.00136    |
| PANTHER_BP_ALL  | BP00071:Proteolysis                                         | 19           | 8.796296 | 0.01810289    | A2M, FBXL20, MMP9, LGMN, MMP19, HERCS, ANPEP, MMP14, CASP5,          | 1.79003261          | 0.91814613        | 0.56581007       | 19.3244    |
| PANTHER_BP_ALL  | BP00122:Ligand-mediated signaling                           | 11           | 5.092593 | 0.01984852    | A2M, PPARD, TNFSF10, LILRB5, VEGFA, EDN1, SOCS6, CCL8, HBEGF, CCI    | 2.32235618          | 0.93585421        | 0.49674044       | 20.9942    |
| PANTHER_BP_ALL  | BP00176:Blood clotting                                      | 5            | 2.314815 | 0.02167494    | CD9, THBD, ITGB5, THBS1, THBS3                                       | 4.68353964          | 0.95031842        | 0.45142112       | 22.7074    |
| PANTHER_BP_ALL  | BP00116:JNK cascade                                         | 4            | 1.851852 | 0.03670277    | SH3BP5, TNFRSF21, DUSP4, CXCL10                                      | 5.43290598          | 0.99404115        | 0.57421164       | 35.5659    |
| PANTHER_BP_ALL  | BP00114:MAPKKK cascade                                      | 6            | 2.777778 | 0.06551715    | SPRY2, DUSP4, ETV7, RPS6KA2, PPM1K, VEGFA                            | 2.76249457          | 0.99990704        | 0.7345156        | 54.9089    |
| PANTHER_BP_ALL  | BP00107:Cytokine and chemokine mediated signaling pathwa    | 7            | 3.240741 | 0.06573994    | TNFSF10, SOCS1, CX3CR1, SOCS6, CCL8, CCL18, CXCL10                   | 2.44830527          | 0.99991003        | 0.68792371       | 55.0351    |
| PANTHER_BP_ALL  | BP00145:Small molecule transport                            | 5            | 2.314815 | 0.07790946    | SLC15A2, SLC6A8, SLC6A12, SLC25A29, ABCC3                            | 3.0868784           | 0.99998507        | 0.70907876       | 61.4572    |
